# Supplementary material
Source: PubMed Central journal article supplement (PMC5499676)
Supplement: NIHMS871609-supplement.pdf [file NIHMS871609-supplement.pdf]

## **Indirect pathway of caudal basal ganglia for rejection of valueless visual objects**

**Hyoung F. Kim, Hidetoshi Amita and Okihide Hikosaka**

Contains 4 Supplemental Figures

### **Supplemental figures**

- Figure S1, related to Figure 1 and 5: CDt projections to cvGPe and cdLSNr
- Figure S2, related to Figure 4: Flexible value coding in GPe
- Figure S3, related to Figure 6: Orthodromic responses of cvGPe neurons by CDt stimulation.
- Figure S4, related to Figure 6: Orthodromic responses of cdLSNr neurons by cvGPe stimulation.

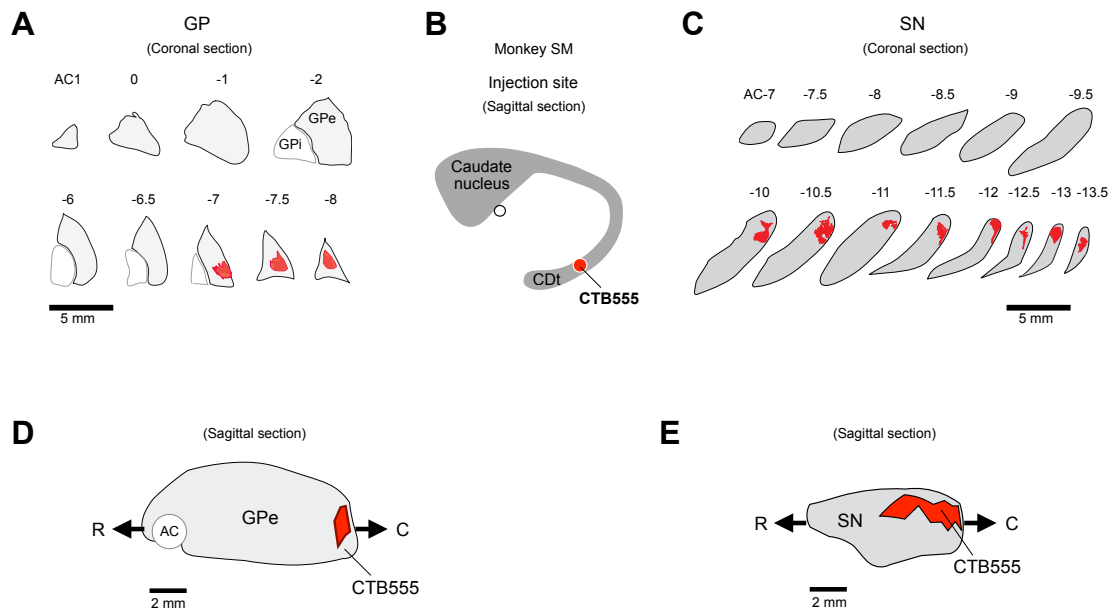

**Figure S1 (related to Figure 1). CTd projections to cvGPe and cdISNr.**

Data in monkey SM which are similar to data in monkey ZO (Fig. 1 and Fig. 5E-G). **(A)** Within GPe, anterograde axon terminals from CDt were localized in cvGPe. **(B)** CTB555 injection site in CDt in monkey SM. **(C)** Within SN, anterograde axon terminals from CDt were localized in cdISNr. **(D,E)** Sagittal view of CDt-projection site in GPe **(D)** and SN **(E)**.

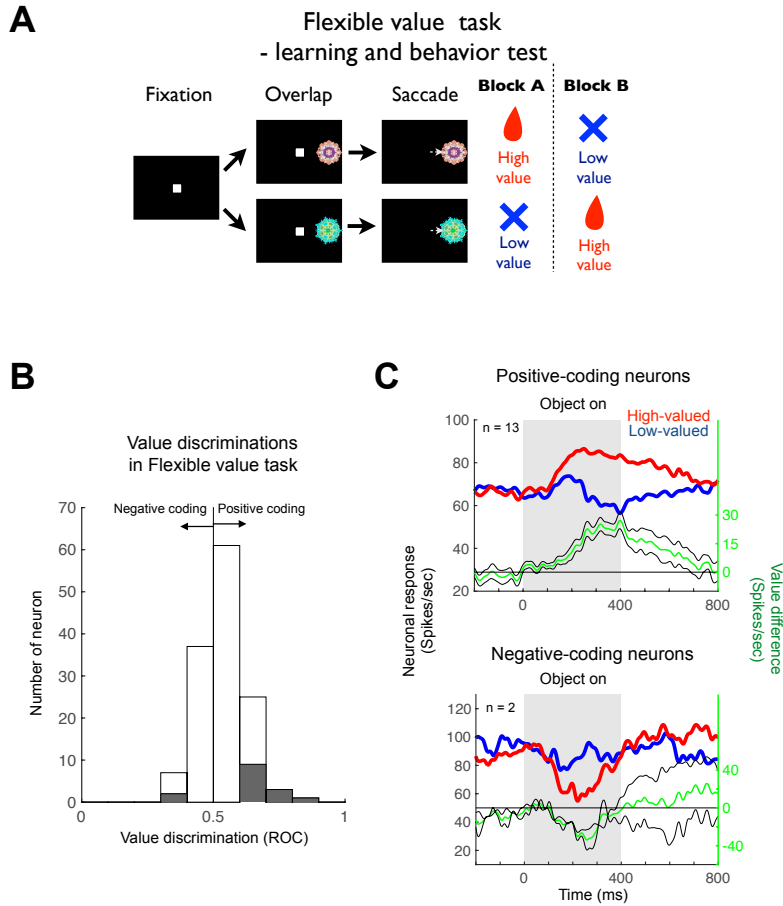

**Figure S2 (related to Figure 4). Flexible value coding in GPe.**

**(A)** Flexible value task. An example set of fractal objects whose values were flexibly reversed across blocks of trials: high-valued (with reward outcome) and low-valued (with no reward outcome). **(B)** Flexible value discrimination of GPe neurons. For each neuron, the difference in response to high-valued and low-valued objects was calculated as ROC area. Among the 134 neurons, 15 neurons showed statistically significant flexible value coding (shown by gray area) ( $p < 0.05$ , Wilcoxon rank-sum test). **(C)** Population responses, shown separately for positive-coding neurons (top,  $n=13$ ) and negative-coding neurons (right,  $n=2$ ). The same format as in Fig. 4C.

### Orthodromic responses of cvGPe neurons by Cdt stimulation

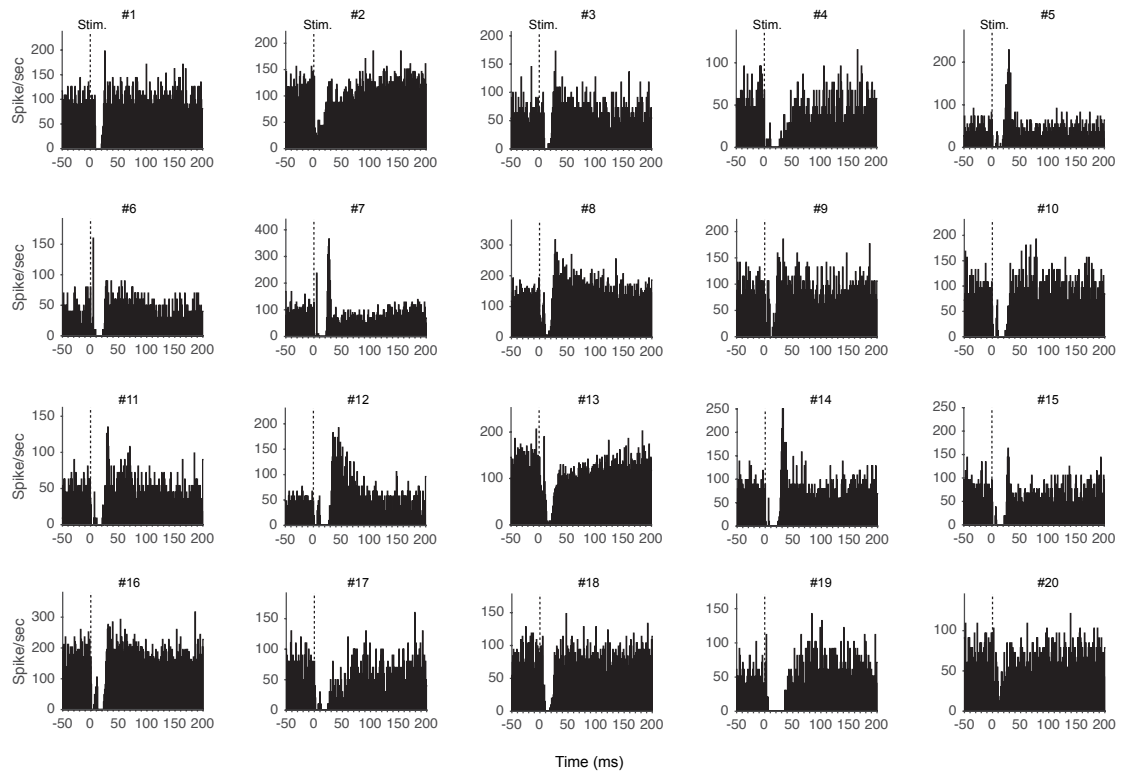

**Figure S3 (related to Figure 6). Orthodromic responses of 20 cvGPe neurons by Cdt stimulation.**

Among 20 orthodromically activated neurons in cvGPe, 12 neurons (#1-#12) encoded stable values of fractal objects (See Fig. 6D).

### Orthodromic responses of cdISNr neurons by cvGPe stimulation

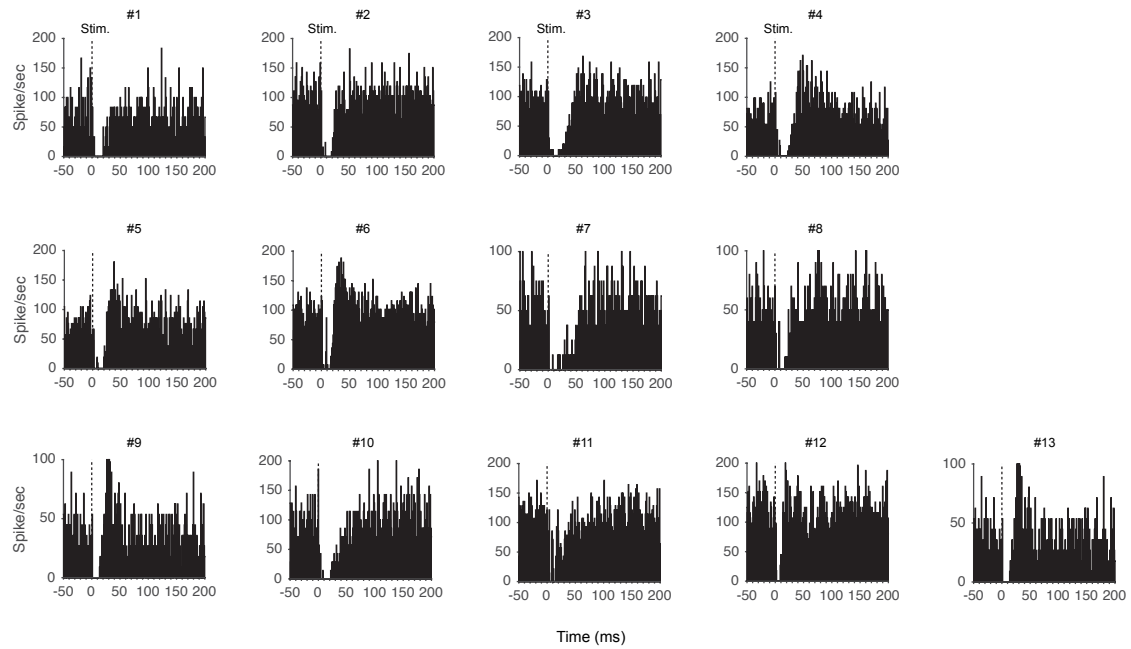

**Figure S4 (related to Figure 6). Orthodromic responses of 13 cdISNr neurons by cvGPe stimulation.**

Among 13 orthodromically activated neurons in cdISNr, 6 neurons (#1-#6) encoded stable values of fractal objects (See Fig. 6G).
